# Supplementary material for: Urine TNF-α and IL-9 for clinical diagnosis of acute interstitial nephritis
Source: JCI journal article supplement (doi:10.1172/jci.insight.127456), 2019-05-15
Supplement: sd1 [file 1]

## Urine tumor necrosis factor- $\alpha$ and interleukin-9 for clinical diagnosis of acute interstitial nephritis

Dennis G. Moledina, MBBS, PhD; F. Perry Wilson, MD, MS; Jordan S. Pober, MD, PhD; Mark A. Perazella, MD; Nikhil Singh, MD, PhD; Randy Luciano, MD, PhD; Wassim Obeid, PhD; Haiqun Lin, MD, PhD; Michael Kuperman, MD; Gilbert W. Moeckel, MD, PhD; Michael Kashgarian, MD; Lloyd G. Cantley, MD; Chirag R. Parikh, MD, PhD

### Contents

|                                                                                                                                                                               |    |
|-------------------------------------------------------------------------------------------------------------------------------------------------------------------------------|----|
| SUPPLEMENTAL TABLES AND FIGURES .....                                                                                                                                         | 2  |
| Supplementary Table 1. Participants selected for adjudication by three pathologists and adjudication results                                                                  | 2  |
| Supplementary Table 2. Comparison of urine and plasma biomarker levels between AIN and controls in the two sub-cohorts of the study .....                                     | 3  |
| Supplementary Table 3. Alternate splitting of cohort to determine validity of biomarkers.....                                                                                 | 4  |
| Supplementary Table 4. Alternate approaches to acute interstitial nephritis diagnosis and biomarkers.....                                                                     | 5  |
| Supplementary Table 5. Drug-induced acute interstitial nephritis and all controls .....                                                                                       | 6  |
| Supplementary Table 6. Comparison of biomarkers between drug-related and other causes of acute interstitial nephritis .....                                                   | 7  |
| Supplementary Table 7. Post-test probabilities of acute interstitial nephritis at a range of pre-test probabilities .....                                                     | 8  |
| Supplementary Table 8. Correlation coefficients between cells on biopsy and urine biomarkers.....                                                                             | 9  |
| Supplementary Table 9. Urine biomarker to albumin ratio and fractional excretion of biomarker .....                                                                           | 10 |
| Supplementary Table 10. Comparison of urine biomarker levels between those who did and did not receive corticosteroid therapy.....                                            | 11 |
| Supplementary Table 11. Association of urine biomarker levels with corticosteroid dose.....                                                                                   | 12 |
| Supplementary Table 12. Summary of the cytokines and chemokines measured in the study and their general function .....                                                        | 13 |
| Supplementary Table 13. Ordinal scale used by pathologists to record interstitial histologic features of acute interstitial nephritis .....                                   | 14 |
| Supplementary Table 14. Detection range and precision of biomarkers.....                                                                                                      | 15 |
| Supplementary Figure 1. Comparison of urine biomarkers between AIN cases and controls .....                                                                                   | 16 |
| Supplementary Figure 2. Post-test probabilities of acute interstitial nephritis at a range of pre-test probabilities at two cut-offs of tumor necrosis factor- $\alpha$ ..... | 17 |
| Supplementary Figure 3. Colocalization of TNF- $\alpha$ and FCER1 staining cells in patients with acute interstitial nephritis .....                                          | 18 |
| Supplementary Figure 4. Association of eosinophil-related cytokine and chemokines in AIN.....                                                                                 | 19 |

## SUPPLEMENTAL TABLES AND FIGURES

Supplementary Table 1. Participants selected for adjudication by three pathologists and adjudication results

| Official biopsy report                            | Total | Selected for adjudication | Number of pathologists diagnosing AIN |            |           |
|---------------------------------------------------|-------|---------------------------|---------------------------------------|------------|-----------|
|                                                   |       |                           | All 3                                 | 2 out of 3 | 1 or 0    |
| <b>AIN</b>                                        | 79    | 79 (100%)                 | 32 (41%)                              | 23 (29%)   | 24 (30%)  |
| <b>1<sup>st</sup> Diagnosis<sup>1</sup></b>       | 38    | 38                        | 21 (66%)                              | 10 (44%)   | 7 (29%)   |
| <b>2<sup>nd</sup> or 3<sup>rd</sup> Diagnosis</b> | 41    | 41                        | 11 (34%)                              | 13 (57%)   | 17 (71%)  |
| <b>Not AIN</b>                                    | 186   | 28 (15%)                  | 0 (0%)                                | 0 (0%)     | 28 (100%) |

<sup>1</sup>1<sup>st</sup>, 2<sup>nd</sup>, and 3<sup>rd</sup> diagnosis refer to the numerical order in which AIN was listed on the official biopsy report. Agreement on AIN diagnosis between pairs of pathologists ranged from 63-70% and overall Fleiss kappa was 0.35.

Supplementary Table 2. Comparison of urine and plasma biomarker levels between AIN and controls in the two sub-cohorts of the study

| Characteristic | Sub-cohort 1: Jan 2015-Jan 2017 |                       |        | Sub-cohort 2: Jan 2017-June 2018 |                      |       |
|----------------|---------------------------------|-----------------------|--------|----------------------------------|----------------------|-------|
|                | AIN                             | NOT AIN               | P      | AIN                              | NOT AIN              | P     |
| <b>N</b>       | <b>22</b>                       | <b>105</b>            |        | <b>10</b>                        | <b>81</b>            |       |
| <b>Urine</b>   |                                 |                       |        |                                  |                      |       |
| TNF- $\alpha$  | 2.25 (0.70, 16.13)              | 0.33 (0.14, 1.23)     | 0.0001 | 3.76 (0.34, 15.03)               | 0.32 (0.10, 1.07)    | 0.01  |
| IL9            | 1.60 (0.45, 3.60)               | 0.38 (0.17, 0.63)     | 0.0002 | 2.61 (0.86, 4.52)                | 0.41 (0.16, 1.16)    | 0.001 |
| IL12p70        | 0.26 (0.17, 0.34)               | 0.12 (0.07, 0.21)     | 0.0004 | 0.10 (0.04, 0.22)                | 0.08 (0.04, 0.22)    | 0.90  |
| IL2            | 0.68 (0.43, 2.72)               | 0.32 (0.20, 0.55)     | 0.0005 | 0.29 (0.14, 0.83)                | 0.27 (0.10, 0.52)    | 0.41  |
| IL6            | 12.50 (4.89, 48.15)             | 2.64 (1.02, 9.99)     | 0.0006 | 9.05 (4.34, 15.44)               | 3.14 (1.27, 8.73)    | 0.04  |
| IL4            | 0.07 (0.06, 0.13)               | 0.05 (0.02, 0.08)     | 0.01   | 0.03 (0.03, 0.08)                | 0.03 (0.01, 0.06)    | 0.44  |
| IFN- $\gamma$  | 1.63 (0.36, 4.08)               | 0.51 (0.25, 0.85)     | 0.01   | 0.26 (0.17, 5.34)                | 0.59 (0.26, 1.76)    | 0.38  |
| IL13           | 1.76 (1.24, 3.02)               | 1.00 (0.57, 1.72)     | 0.01   | 1.06 (0.23, 2.08)                | 0.33 (0.16, 1.33)    | 0.26  |
| IL1 $\beta$    | 2.97 (1.59, 10.85)              | 1.29 (0.44, 3.68)     | 0.02   | 1.70 (1.05, 7.99)                | 0.62 (0.36, 2.09)    | 0.07  |
| IL8            | 93.39 (59.23, 177.22)           | 50.63 (16.09, 168.16) | 0.03   | 94.18 (28.11, 306.20)            | 27.07 (7.46, 129.75) | 0.07  |
| IL5            | 0.12 (0.08, 0.81)               | 0.09 (0.04, 0.22)     | 0.05   | 0.19 (0.06, 0.54)                | 0.10 (0.06, 0.19)    | 0.31  |
| IL10           | 0.15 (0.08, 0.24)               | 0.09 (0.04, 0.17)     | 0.10   | 0.23 (0.15, 0.37)                | 0.20 (0.14, 0.35)    | 0.56  |
| <b>Plasma</b>  |                                 |                       |        |                                  |                      |       |
| IL13           | 0.48 (0.48, 0.48)               | 0.48 (0.48, 0.48)     | 0.15   | 0.19 (0.19, 0.48)                | 0.19 (0.19, 0.55)    | 0.81  |
| IL8            | 9.06 (4.15, 14.23)              | 9.72 (5.41, 17.70)    | 0.26   | 10.40 (5.90, 14.28)              | 10.13 (5.53, 16.47)  | 0.84  |
| IL4            | 0.01 (0.01, 0.04)               | 0.01 (0.01, 0.01)     | 0.33   | 0.03 (0.02, 0.04)                | 0.03 (0.02, 0.04)    | 0.63  |
| IFN- $\gamma$  | 6.61 (3.33, 85.49)              | 7.28 (2.91, 17.37)    | 0.35   | 6.74 (2.40, 14.84)               | 3.18 (1.56, 6.51)    | 0.16  |
| IL6            | 3.18 (2.04, 19.69)              | 3.52 (1.53, 7.78)     | 0.36   | 3.30 (1.85, 9.95)                | 3.47 (1.38, 8.33)    | 0.68  |
| IL2            | 0.13 (0.06, 0.42)               | 0.06 (0.06, 0.30)     | 0.42   | 0.39 (0.16, 0.67)                | 0.22 (0.13, 0.34)    | 0.17  |
| IL1 $\beta$    | 0.20 (0.06, 0.33)               | 0.15 (0.06, 0.28)     | 0.45   | 0.30 (0.18, 0.71)                | 0.17 (0.02, 0.35)    | 0.11  |
| IL10           | 0.47 (0.27, 0.90)               | 0.57 (0.32, 1.32)     | 0.50   | 0.93 (0.49, 1.42)                | 0.52 (0.32, 1.04)    | 0.06  |
| IL12p70        | 0.08 (0.03, 0.13)               | 0.08 (0.03, 0.18)     | 0.55   | 0.10 (0.08, 0.19)                | 0.15 (0.09, 0.24)    | 0.29  |
| TNF- $\alpha$  | 6.61 (4.54, 10.07)              | 6.31 (4.04, 8.56)     | 0.56   | 9.52 (7.46, 13.53)               | 6.33 (4.48, 9.88)    | 0.01  |

Wilcoxon rank sum test. Sorted by P-value (low to high). Median and interquartile range are shown. TNF- $\alpha$  and IL-9 were selected for further analysis based on consistency and strength of association in both cohorts and biological plausibility of their association with AIN based on our hypothesis. TNF, tumor necrosis factor; IFN, interferon; IL, interleukin

Supplementary Table 3. Alternate splitting of cohort to determine validity of biomarkers

| Biomarker          | AIN                             | Not AIN           | P-value | AIN                              | Not AIN           | P-value |
|--------------------|---------------------------------|-------------------|---------|----------------------------------|-------------------|---------|
| Year of enrollment | Sub-cohort 1: Jan 2015-Jan 2017 |                   |         | Sub-cohort 2: Jan 2017-June 2018 |                   |         |
|                    | <b>22</b>                       | <b>105</b>        |         | <b>10</b>                        | <b>81</b>         |         |
| TNF- $\alpha$      | 2.25 (0.70, 16.13)              | 0.33 (0.14, 1.23) | <0.001  | 3.76 (0.34, 15.03)               | 0.32 (0.10, 1.07) | 0.01    |
| IL9                | 1.60 (0.45, 3.60)               | 0.38 (0.17, 0.63) | <0.001  | 2.61 (0.86, 4.52)                | 0.41 (0.16, 1.16) | 0.001   |
| Site of enrollment | Site 1                          |                   |         | Site 2                           |                   |         |
|                    | <b>24</b>                       | <b>146</b>        |         | <b>8</b>                         | <b>40</b>         |         |
| TNF- $\alpha$      | 2.25 (0.58, 0.58)               | 0.30 (0.13, 0.83) | <0.001  | 3.97 (0.37, 11.15)               | 0.41 (0.17, 2.80) | 0.04    |
| IL9                | 1.62 (0.55, 0.55)               | 0.37 (0.16, 0.68) | <0.001  | 2.08 (0.55, 3.60)                | 0.46 (0.22, 1.15) | 0.02    |

Median (IQR) shown. Wilcoxon Ranksum test. TNF, tumor necrosis factor; IL, interleukin.

Supplementary Table 4. Alternate approaches to acute interstitial nephritis diagnosis and biomarkers

| Biomarker                                                                 | AIN                        | Not AIN           | P-value | AIN                         | Not AIN           | P-value |
|---------------------------------------------------------------------------|----------------------------|-------------------|---------|-----------------------------|-------------------|---------|
|                                                                           | Phase 1: Jan 2015-Jan 2017 |                   |         | Phase 2: Jan 2017-June 2018 |                   |         |
| <b>A. Consensus diagnosis (Primary analysis)</b>                          |                            |                   |         |                             |                   |         |
|                                                                           | 22                         | 105               |         | 10                          | 81                |         |
| <b>TNF-<math>\alpha</math></b>                                            | 2.25 (0.70, 0.70)          | 0.33 (0.14, 1.23) | <0.001  | 3.76 (0.34, 15.03)          | 0.32 (0.10, 1.07) | 0.01    |
| <b>IL9</b>                                                                | 1.60 (0.45, 0.45)          | 0.38 (0.17, 0.63) | <0.001  | 2.61 (0.86, 4.52)           | 0.41 (0.16, 1.16) | 0.001   |
| <b>B. Majority diagnosis (Sensitivity Analysis 1)</b>                     |                            |                   |         |                             |                   |         |
|                                                                           | 35                         | 120               |         | 20                          | 90                |         |
| <b>TNF-<math>\alpha</math></b>                                            | 1.45 (0.41, 0.41)          | 0.34 (0.16, 1.35) | <0.001  | 2.37 (0.33, 11.37)          | 0.37 (0.10, 1.18) | 0.01    |
| <b>IL9</b>                                                                | 0.66 (0.29, 0.29)          | 0.36 (0.17, 0.64) | 0.001   | 1.47 (0.26, 2.85)           | 0.41 (0.16, 1.28) | 0.04    |
| <b>C. Clinician's post-biopsy diagnosis (Sensitivity Analysis 2)</b>      |                            |                   |         |                             |                   |         |
|                                                                           | 48                         | 102               |         | 31                          | 76                |         |
| <b>TNF-<math>\alpha</math></b>                                            | 1.13 (0.38, 0.38)          | 0.34 (0.15, 1.23) | <0.001  | 1.07 (0.14, 6.44)           | 0.34 (0.11, 1.14) | 0.03    |
| <b>IL9</b>                                                                | 0.59 (0.27, 0.27)          | 0.34 (0.17, 0.60) | <0.001  | 1.00 (0.28, 2.96)           | 0.41 (0.16, 1.27) | 0.03    |
| <b>D. AIN reported on official biopsy report (Sensitivity Analysis 3)</b> |                            |                   |         |                             |                   |         |
|                                                                           | 50                         | 105               |         | 29                          | 81                |         |
| <b>TNF-<math>\alpha</math></b>                                            | 1.16 (0.39, 0.39)          | 0.33 (0.14, 1.23) | <0.001  | 2.37 (0.32, 13.45)          | 0.32 (0.10, 1.07) | 0.008   |
| <b>IL9</b>                                                                | 0.56 (0.22, 0.22)          | 0.38 (0.17, 0.63) | 0.01    | 1.13 (0.26, 3.01)           | 0.41 (0.16, 1.16) | 0.01    |

AIN case definitions: A) AIN as consensus among the pathologists (primary analysis); B) AIN diagnosis based on diagnosis of majority of pathologists; C) Clinician's diagnosis after biopsy; D) AIN as reported on official biopsy report. Median (IQR) shown. Wilcoxon Ranksum test. TNF, tumor necrosis factor; IL, interleukin.

Supplementary Table 5. Drug-induced acute interstitial nephritis and all controls

| Biomarker     | AIN                | Not AIN           | P-value |
|---------------|--------------------|-------------------|---------|
| <b>N</b>      | <b>20</b>          | <b>186</b>        |         |
| TNF- $\alpha$ | 3.16 (0.34, 43.61) | 0.32 (0.13, 1.18) | 0.001   |
| IL9           | 1.85 (0.66, 6.07)  | 0.39 (0.17, 0.78) | <0.001  |

Drug induced AIN was thought to be due to antibiotics (n=6), proton pump inhibitors (n=3), non-steroidal anti-inflammatory drugs (n=2), cancer immunotherapy (n=3), and others (n=6). Median (IQR) are shown. Wilcoxon Ranksum test

Supplementary Table 6. Comparison of biomarkers between drug-related and other causes of acute interstitial nephritis

| <b>Biomarker</b> | <b>Drug-related</b> | <b>Other AIN</b>  | <b>P-value</b> |
|------------------|---------------------|-------------------|----------------|
| <b>N</b>         | <b>20</b>           | <b>12</b>         |                |
| TNF- $\alpha$    | 3.16 (0.34, 43.61)  | 2.05 (0.87, 6.79) | 0.78           |
| IL9              | 1.85 (0.66, 6.07)   | 1.78 (0.55, 2.85) | 0.61           |

Median (IQR) are shown. Wilcoxon Ranksum test.

Supplementary Table 7. Post-test probabilities of acute interstitial nephritis at a range of pre-test probabilities

| Pre-test Prob. | Post-test Probabilities |          |           |          |                               |          |           |          |
|----------------|-------------------------|----------|-----------|----------|-------------------------------|----------|-----------|----------|
|                | All controls            |          |           |          | Acute tubular injury controls |          |           |          |
|                | 0.41 ng/g               |          | 2.53 ng/g |          | 0.41 ng/g                     |          | 2.53 ng/g |          |
|                | Positive                | Negative | Positive  | Negative | Positive                      | Negative | Positive  | Negative |
| <b>0.90</b>    | 0.95                    | 0.68     | 0.97      | 0.85     | 0.95                          | 0.65     | 0.99      | 0.84     |
| <b>0.75</b>    | 0.85                    | 0.41     | 0.92      | 0.66     | 0.87                          | 0.39     | 0.98      | 0.64     |
| <b>0.50</b>    | 0.66                    | 0.19     | 0.80      | 0.39     | 0.69                          | 0.17     | 0.94      | 0.37     |
| <b>0.25</b>    | 0.40                    | 0.07     | 0.58      | 0.18     | 0.43                          | 0.07     | 0.84      | 0.17     |
| <b>0.10</b>    | 0.18                    | 0.03     | 0.31      | 0.07     | 0.20                          | 0.02     | 0.65      | 0.06     |



Supplementary Table 8. Correlation coefficients between cells on biopsy and urine biomarkers

|                                         | <b>TNF-<math>\alpha</math>, cells</b> | <b>Fc<math>\epsilon</math>RI, cells</b> | <b>Urine TNF-<math>\alpha</math></b> | <b>Urine IL-9</b> |
|-----------------------------------------|---------------------------------------|-----------------------------------------|--------------------------------------|-------------------|
| <b>TNF-<math>\alpha</math>, cells</b>   | 1                                     |                                         |                                      |                   |
| <b>Fc<math>\epsilon</math>RI, cells</b> | 0.77*                                 | 1                                       |                                      |                   |
| <b>Urine TNF-<math>\alpha</math></b>    | 0.48*                                 | 0.41                                    | 1                                    |                   |
| <b>Urine IL-9</b>                       | 0.21                                  | 0.29                                    | 0.54*                                | 1                 |

Spearman correlation coefficients ( $\rho$ ). \* indicates  $P < 0.05$ . TNF, tumor necrosis factor; IL, interleukin.

Supplementary Table 9. Urine biomarker to albumin ratio and fractional excretion of biomarker

| <b>Biomarker</b>                                                             | <b>AIN</b>           | <b>Not AIN</b>    | <b>P-value</b> |
|------------------------------------------------------------------------------|----------------------|-------------------|----------------|
| <b>N</b>                                                                     | <b>31</b>            | <b>176</b>        |                |
| <b>Urine TNF-<math>\alpha</math> to plasma TNF-<math>\alpha</math> ratio</b> | 0.24 (0.05, 0.55)    | 0.04 (0.02, 0.10) | <0.001         |
| <b>Urine TNF-<math>\alpha</math> to urine albumin ratio</b>                  | 18.21 (2.34, 123.18) | 0.64 (0.18, 3.30) | <0.001         |
| <b>Urine IL-9 to urine albumin ratio</b>                                     | 13.11 (1.27, 38.23)  | 0.47 (0.17, 2.71) | <0.001         |

*Wilcoxon Ranksum test. Median (IQR) are shown.*

Supplementary Table 10. Comparison of urine biomarker levels between those who did and did not receive corticosteroid therapy

| <b>Biomarkers</b> | <b>Steroids before urine</b> | <b>No steroids</b> | <b>P-val.</b> |
|-------------------|------------------------------|--------------------|---------------|
|                   | <b>35</b>                    | <b>183</b>         |               |
| TNF-a             | 0.41 (0.16, 1.23)            | 0.38 (0.14, 1.72)  | 0.76          |
| IL-9              | 0.36 (0.18, 0.78)            | 0.41 (0.17, 1.19)  | 0.42          |

Wilcoxon rank sum test. Includes participants who received steroids between 7 days and 6 hours before urine collection.

Supplementary Table 11. Association of urine biomarker levels with corticosteroid dose

| Biomarker | Comparison       | Steroid Dose in mg (95% CI) |                         |
|-----------|------------------|-----------------------------|-------------------------|
|           |                  | Model 1                     | Model 2                 |
| TNF-a     | Per log increase | -8 (-103, 87)               | -19 (-120, 82)          |
|           | Below median     | Ref.                        | Ref.                    |
|           | Above median     | -103 (-415, 208)            | -131 (-453, 190)        |
| IL-9      | Per log increase | -105 (-237, 28)             | <b>-180 (-333, -27)</b> |
|           | Below median     | Ref.                        | Ref.                    |
|           | Above median     | -276 (-576, 24)             | <b>-330 (-640, -19)</b> |

Linear regression analysis with biomarker quartile as outcome and steroid dose as predictor (Model 1). Model 2 controls for histological diagnosis (AIN yes/no).

Supplementary Table 12. Summary of the cytokines and chemokines measured in the study and their general function

| Biomarker                          | Producer Cells                                   | Action                                                                                 |
|------------------------------------|--------------------------------------------------|----------------------------------------------------------------------------------------|
| <b>T<sub>H</sub>2 cell-related</b> |                                                  |                                                                                        |
| IL-4                               | T cells, mast cells, ILC2                        | B-cell activation, T <sub>H</sub> 2 differentiation                                    |
| IL-5                               | T cells, mast cells, ILC2                        | Eosinophil growth and differentiation                                                  |
| IL-13                              | T cells, ILC2                                    | B cell growth and differentiation, induces allergy/asthma, suppresses T <sub>H</sub> 1 |
| <b>T<sub>H</sub>9 cell-related</b> |                                                  |                                                                                        |
| IL-9                               | T cells                                          | Mast cell enhancing activating. Stimulates T <sub>H</sub> 2 and ILC2 cells             |
| <b>T<sub>H</sub>1 cell-related</b> |                                                  |                                                                                        |
| IFN- $\gamma$                      | T cells, NK cells, neutrophils, ILC1             | Macrophage activation, increase expression of MHC molecules                            |
| IL-12p70                           | Macrophages, dendritic cells                     | Activates NK cells, induces differentiation into T <sub>H</sub> 1 type                 |
| IL-2                               | T cells                                          | T cell proliferation and differentiation                                               |
| <b>Other inflammatory</b>          |                                                  |                                                                                        |
| TNF- $\alpha$                      | Macrophages, T cells, NK cells                   | Promotes inflammation, endothelial activation                                          |
| IL-1 $\beta$                       | Macrophages, epithelial cells                    | Fever, T cell activation, macrophage activation                                        |
| IL-6                               | T cells, B cells, macrophages, endothelial cells | T and B cell growth and differentiation                                                |
| IL-8 (CXCL8)*                      | Neutrophil, basophil, CD8 cells                  | Chemotaxis of neutrophils, promotes angiogenesis                                       |
| IL-10                              | macrophages, dendritic cells                     | Suppressor of macrophage function                                                      |

\*IL-8 is a chemokine whereas all of the others are cytokines. ILC, innate lymphoid cells; IL, interleukin; NK, natural killer. Adapted from (32)

Supplementary Table 13. Ordinal scale used by pathologists to record interstitial histologic features of acute interstitial nephritis

| Interstitial features                                                            |                                                          |
|----------------------------------------------------------------------------------|----------------------------------------------------------|
| 1                                                                                | Tubulointerstitial inflammation, preserved area*         |
| 2                                                                                | Tubulitis^                                               |
| 3                                                                                | Interstitial Eosinophils#                                |
| 4                                                                                | Tubulointerstitial inflammation, <i>fibrosed</i> area*   |
| 5                                                                                | Acute tubular injury, overall*                           |
| 6                                                                                | Acute tubular injury, areas <i>without</i> inflammation* |
| 7                                                                                | Tubular atrophy / interstitial fibrosis*                 |
| *None (<10%), Mild (10-25%), Moderate (26-50%), Severe (>50%)                    |                                                          |
| ^0 (no cells), 1 (1-4 cells), 2 (5-10 cells), 3 (>10 cells) per tubule           |                                                          |
| #0 (no cells), 1 (1-4 cells), 2 (5-10 cells), 3 (>10 cells) per high power field |                                                          |

Supplementary Table 14. Detection range and precision of biomarkers

| Biomarker                      | Detection range (pg/ml) |            | CV (%) |        |
|--------------------------------|-------------------------|------------|--------|--------|
|                                | Urine                   | Plasma     | Urine  | Plasma |
| <b>TNF-<math>\alpha</math></b> | 0.10-368                | 0.26-736   | 8.5    | 3.5    |
| <b>IFN-<math>\gamma</math></b> | 0.27-1400               | 0.49-2800  | 10.9   | 3.6    |
| <b>IL-1<math>\beta</math></b>  | 0.05-575                | 0.11-1150  | 6.2    | 2.3    |
| <b>IL-2</b>                    | 0.04-1530               | 0.13-3060  | 7.5    | 10.4   |
| <b>IL-4</b>                    | 0.019-283               | 0.025-566  | 12.9   | 8.2    |
| <b>IL-5</b>                    | 0.10-2080               | N/A        | 8.9    | N/A    |
| <b>IL-6</b>                    | 0.048-765               | 0.096-1530 | 3.7    | 3.7    |
| <b>IL-8</b>                    | 0.055-599               | 0.175-1198 | 2.4    | 2.8    |
| <b>IL-9</b>                    | 0.03-580                | N/A        | 7.1    | N/A    |
| <b>IL-10</b>                   | 0.04-374                | 0.106-748  | 22.6   | 5.4    |
| <b>IL-12p70</b>                | 0.06-501                | 0.058-1002 | 12.7   | 7.6    |
| <b>IL-13</b>                   | 0.446-496               | 0.96-992   | 8.5    | 5.8    |

Plasma IL-5 and IL-9 were not measured due to lack of availability of appropriate assay.

Supplementary Figure 1. Comparison of urine biomarkers between AIN cases and controls

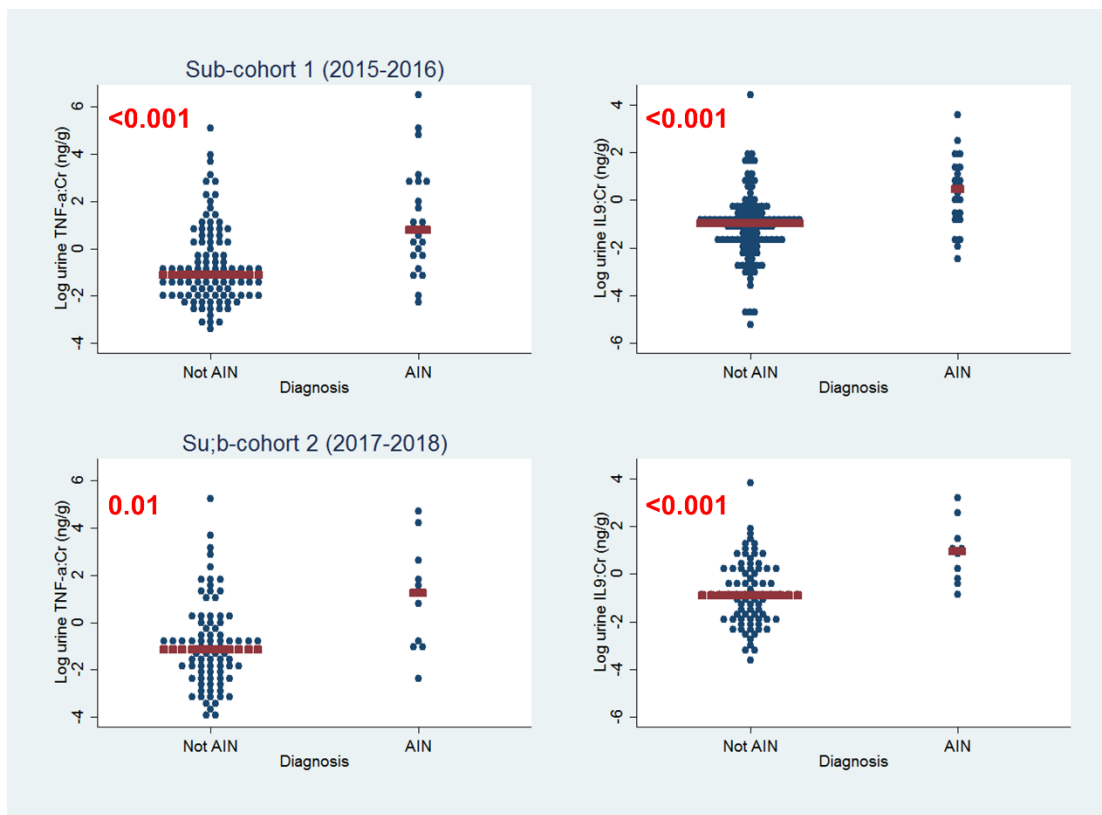

Dot plot of biomarkers (on log scale) are shown. Wilcoxon Ranksum test. Cohort 1 includes 22 AIN participants and 105 without AIN; cohort 2 includes 10 AIN participants, and 81 without AIN. Maroon line represents median value. AIN, acute interstitial nephritis; TNF, tumor necrosis factor; IL, interleukin, Cr, creatinine.



Supplementary Figure 2. Post-test probabilities of acute interstitial nephritis at a range of pre-test probabilities at two cut-offs of tumor necrosis factor- $\alpha$

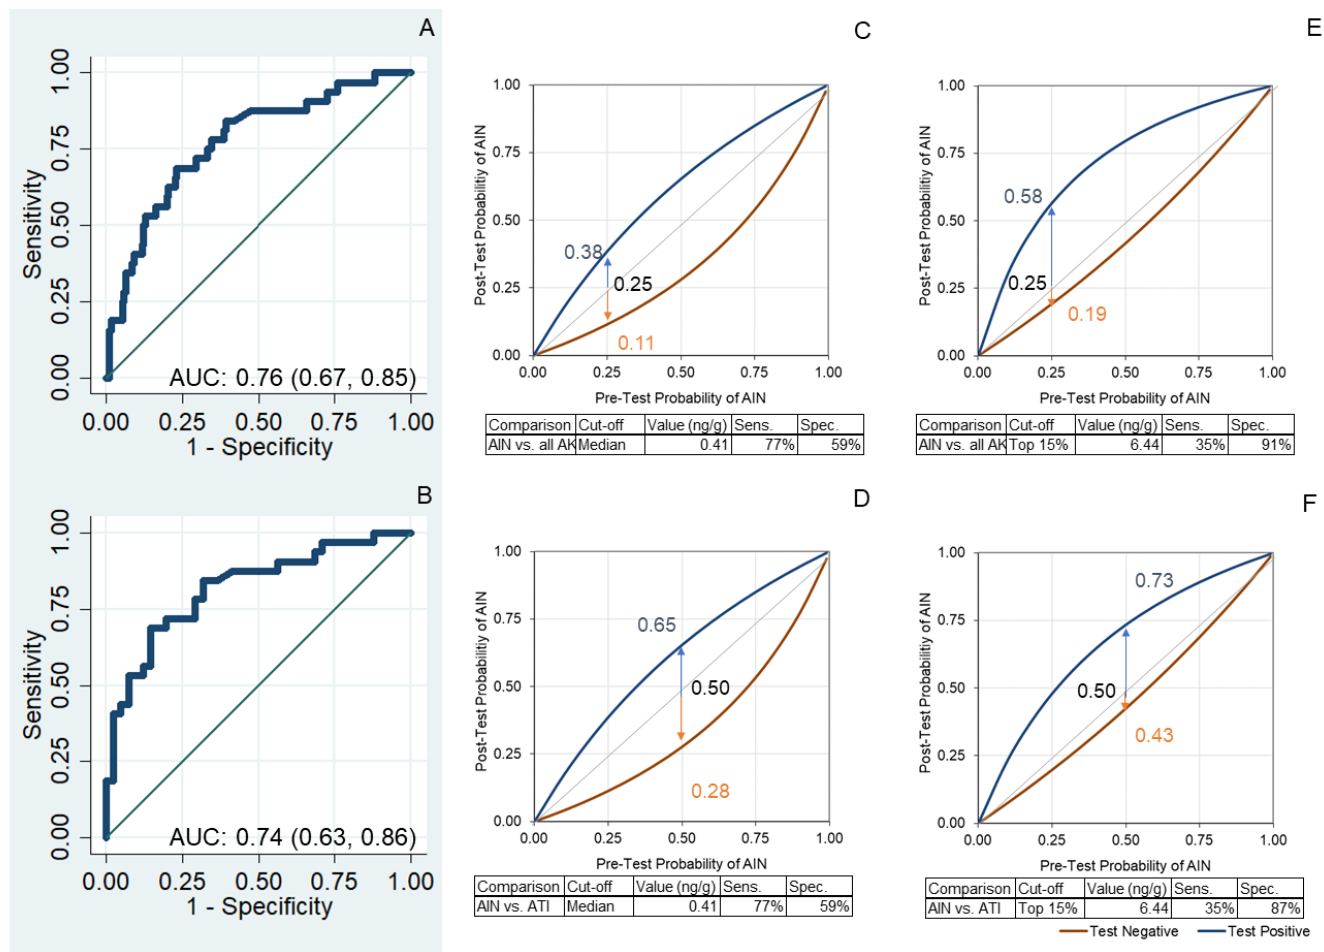

Area under receiver operating characteristics curve (AUC) for outcome of acute interstitial nephritis (AIN) vs. all causes of acute kidney disease (panel A) and AIN vs. acute tubular injury (panel B). Post-test probability of AIN at a range of pre-test probabilities at TNF- $\alpha$  cut-off equal to median (panels C and E) and top 15% values (panels D and F). Top 15% cut-off was chosen based on 15% prevalence of AIN in cohort.

Supplementary Figure 3. Colocalization of TNF- $\alpha$  and FCER1 staining cells in patients with acute interstitial nephritis

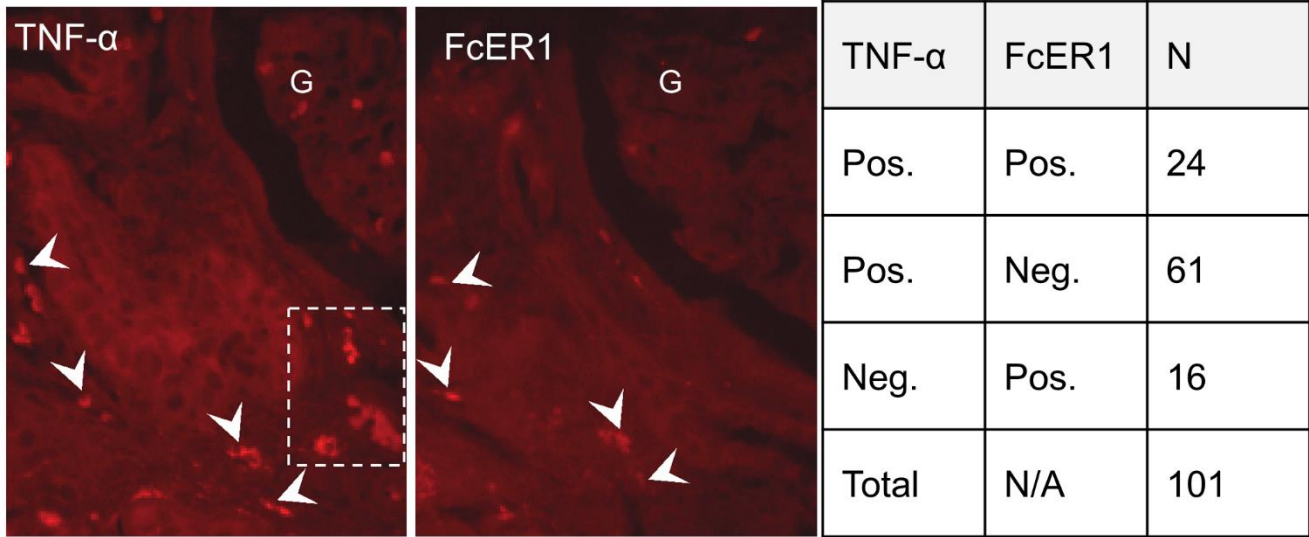

Shown are high magnification (40x) representative images of 5 $\mu$ m adjacent sections stained as follows: Right panel: FCER1 staining and left Panel: TNF $\alpha$  staining. Arrow heads denote cells which stain positive for both markers. Boxed inset shows a group of TNF $\alpha$ -positive, FCER1-negative cells. G: glomerulus. Table denotes results of 101 cells counted from AIN participants in whom sections were aligned (n=4)

Supplementary Figure 4. Association of eosinophil-related cytokine and chemokines in AIN

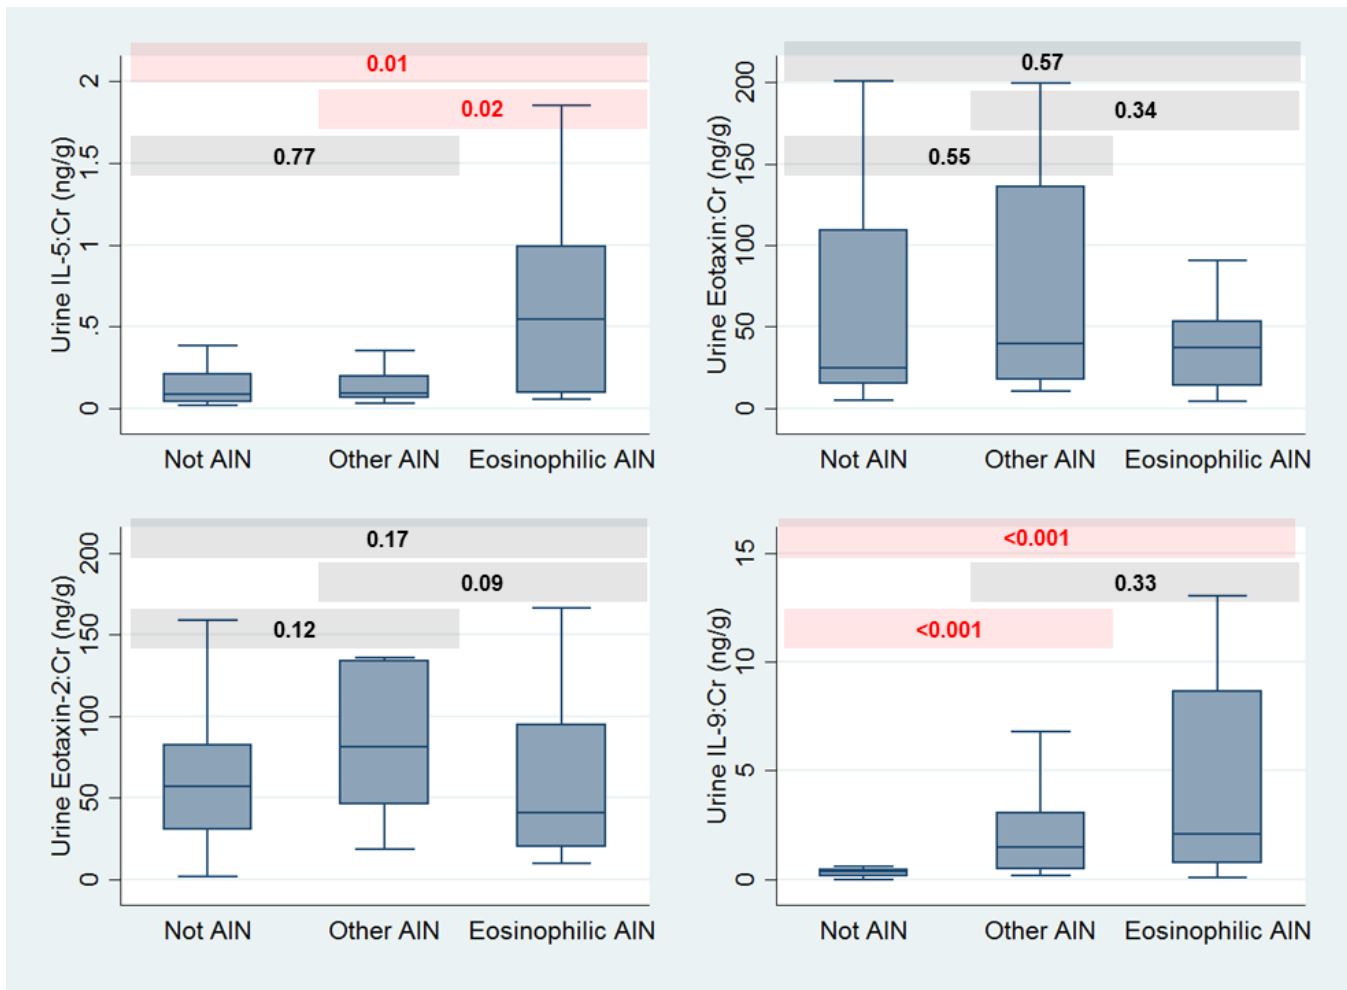

Median (horizontal line), 25<sup>th</sup> and 75<sup>th</sup> percentile (box), and 5<sup>th</sup> and 95<sup>th</sup> percentile (whiskers) of biomarkers are shown. Both urine biomarkers are normalized to urine creatinine and shown in pg/mg. Wilcoxon rank sum test comparing Eosinophilic AIN (n=16) to Non-eosinophilic AIN (n=16), non-eosinophilic AIN to non-AIN (n=24), and Kruskal Wallis test comparing biomarker levels between the three groups.
